# Supplementary material
Source: PubMed Central journal article supplement (PMC2435172)
Supplement: NIHMS1671-supplement-01.pdf [file NIHMS1671-supplement-01.pdf]

**Supplementary Table. Details of SNP markers on chromosome 5 studied in this report.**

| Label Fig. 1 | SNP Marker           | Location <sup>a</sup> | SNP Sequence <sup>b</sup>                                  |
|--------------|----------------------|-----------------------|------------------------------------------------------------|
| A            | rs2070727            | 131848174             | CTGCCCTCAATGAGCCAGCTCCTCT[A/C]AGCCAGTATCACACCCTTGCCATT     |
| C            | rs11242120           | 131898588             | GAATATAAGTAGGTTGATAATAACT[C/T]CTGGCAGGCAGTGGCTTTGCAATTT    |
|              | rs848 <sup>c</sup>   | 132024399             | CAGTGGAC[A/C]CCAGGAG                                       |
| D            | rs2070874            | 132037609             | TTAGCTTCTCCTGATAAACTAATTG[C/T]CTCACATTGTCACTGCAAATCGACA    |
|              | rs31564 <sup>c</sup> | 135258152             | TTCAGCAGCAGCTAAAAACATGGAC[G/T]GTACTIONAAGGGACAGGGGCTGTGC   |
| H            | rs31530              | 135310529             | CTCTTGTTTATTTATCTTAGATCTT[C/T]GGGACTGAGAAATCTAAAAAATAAA    |
| I            | rs31517              | 135314928             | AGCACAAGA[T/C]GTCCACAC                                     |
| J            | rs248166             | 135320607             | GAAGTCATACTTTAAATGATTAGAG[A/G]AAATATAAGTCATTCTATTAAGTGT    |
| K            | rs248163             | 135321150             | CCTTCAGC[A/G]CTTCTG                                        |
| L            | rs248158             | 135321969             | TTCCCTCCTATTTTCCCTGCCTTCTG[C/T]ATTAAGTGTTCCTCAATGTATCTTCC  |
| M            | rs2526146            | 135336658             | TGTAACATCTTT[G/A]ACCTTT                                    |
| N            | rs2526152            | 135340932             | CTGGTCACC[G/A]TATTAA                                       |
| O            | rs30740              | 135354489             | GAAGGGAGACTGGTGAATCAGGGCC[A/G]AGGAAGGGCCATGAGGGGCGTTTGG    |
| P            | rs12520800           | 135357814             | CTCTGTGTCAATTT[T/G]TCCATT                                  |
| Q            | rs13157444           | 135364460             | ACAGGCATAG[A/G]TCACCCT                                     |
| R            | rs4976360            | 135382223             | CTGGAAAC[T/A]TTTCC                                         |
| S            | rs2282790            | 135391774             | GGGCTAGCAGTGCCAAGTAAGTACTGAC[A/G]GGTGATTAATAGATGCTTGGGTAAG |
| T            | rs1054124            | 135416562             | CTGTCTGT[A/G]GAGACCCT                                      |
| U            | rs4669               | 135420175             | ACAGTCTT[CT]GCTCCC                                         |
| V            | rs7725447            | 135434283             | ACTGCAGAA[A/G]GGCT                                         |

<sup>a</sup> Location of the SNP marker on human chromosome 5 (NCBI Build 36, Ensembl Genebuild August 2006, Database version 42.36d).

<sup>b</sup> All SNPs are 5' to 3' with respect to the nearest gene.

<sup>c</sup> These markers are not shown on figure 1 either because there was a single allele (rs848) or they were out of HWE (rs31564; rs2107506).
